# Supplementary material
Source: PubMed Central journal article supplement (PMC4229010)
Supplement: NIHMS547041-supplement-Supp_Fig_S1-S2.pdf [file NIHMS547041-supplement-Supp_Fig_S1-S2.pdf]

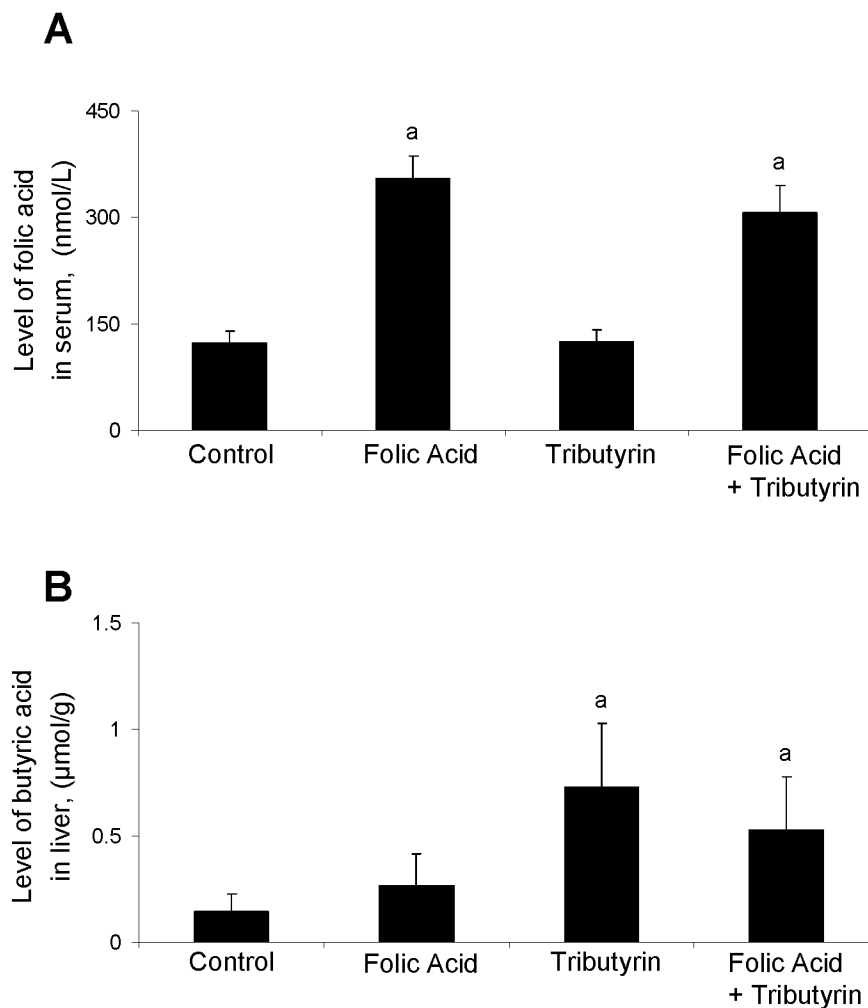

**Supplementary Figure 1.** Levels of folic acid in serum (A) and butyric acid in livers (B) of control rats and rats treated with folic acid, tributyrin, or the combination of folic acid and tributyrin.

<sup>a</sup> – significantly different from control rats (n=7, means  $\pm$  S.D.).

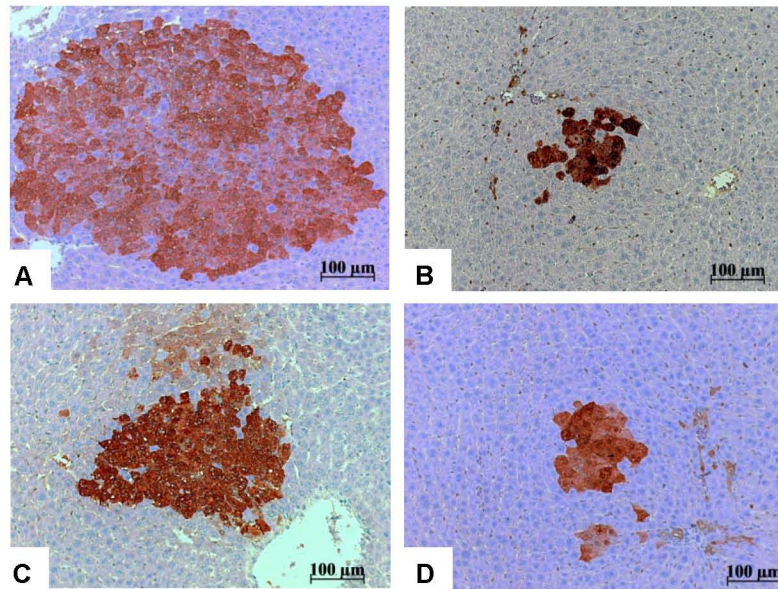

**Supplementary Figure 2.** Immunohistochemical analysis of GSTP in the livers of control rats and rats treated folic acid and tributyrin alone or in combination during promotion stage of rat liver carcinogenesis. Representative images of control liver section (A) and liver sections from folic acid- (B), tributyrin- (C), and folic acid and tributyrin-treated (D) rats are shown. Original magnification - 20X.
